# Supplementary material for: Superior spin-polarized electronic structure in MoS2/MnO2 heterostructures with an efficient hole injection
Source: Royal Society of Chemistry journal article supplement (doi:10.1039/c9cp01146c), 2019-01-01
Supplement: c9cp01146c1.pdf [file c9cp01146c1.pdf]

## Supplementary Information

### **Superior Spin-Polarized Electronic Structure in MoS<sub>2</sub>/MnO<sub>2</sub> Heterostructures with An Efficient Hole Injection**

Baozeng Zhou\*, Zheng Li, Jiaming Wang, Kangqiang Wang

*Tianjin Key Laboratory of Film Electronic & Communicate Devices, School of Electrical and  
Electronic Engineering, Tianjin University of Technology, Tianjin 300384, China*

---

\*Author to whom all correspondence should be addressed.

E-mail: baozeng@tju.edu.cn

**Table S1.** Calculated lattice constant  $a$ ,  $M$ - $X$  bond length ( $d_{M-X}$ ), layer thickness ( $d_{X-X}$ ), interlayer distance  $D$ , energy difference ( $\Delta E$ ) between FM and AFM states, magnetic moments ( $Mag$ ), and work function ( $\Phi$ ) of the pristine monolayers and the most stable most stable configurations in each group.

|                                         | $a$ (Å) | $d_{M-X}$ (Å) | $d_{X-X}$ (Å) | $D$ (Å) | $\Delta E$ (meV) | $Mag$ ( $\mu_B$ ) | $\Phi$ (eV) |
|-----------------------------------------|---------|---------------|---------------|---------|------------------|-------------------|-------------|
| $h$ -MnO <sub>2</sub>                   | 2.90    | 1.85          | 2.31          | –       | 38               | 0.66              | 6.31        |
| $t$ -MnO <sub>2</sub>                   | 2.98    | 1.88          | 2.50          | –       | 53               | 3.00              | 6.98        |
| MoS <sub>2</sub>                        | 3.13    | 2.37          | 3.12          | –       | –                | 0.00              | 5.85        |
| MoS <sub>2</sub> / $h$ MnO <sub>2</sub> | 3.05    | –             | –             | 2.79    | 45               | 1.20              | 5.96        |
| MoS <sub>2</sub> / $t$ MnO <sub>2</sub> | 3.06    | –             | –             | 2.76    | 49               | 3.00              | 6.32        |

**Table S2.** In-plane lattice constant  $a$ , equilibrium interlayer distance  $D$ , and binding energies ( $E_b$ ) of all stacking models.

| MoS <sub>2</sub> / <i>h</i> -MnO <sub>2</sub> | AA     | AB     | C27    | C28    | T1     | T2     |
|-----------------------------------------------|--------|--------|--------|--------|--------|--------|
| $a$ (Å)                                       | 3.05   | 3.05   | 3.03   | 3.05   | 3.06   | 3.05   |
| $D$ (Å)                                       | 3.21   | 2.79   | 2.86   | 3.18   | 2.83   | 2.80   |
| $E_b$ (meV)                                   | -133.7 | -296.5 | -239.2 | -138.3 | -221.7 | -243.6 |
| MoS <sub>2</sub> / <i>t</i> -MnO <sub>2</sub> | fcc-I  | fcc-II | hcp-I  | hcp-II | top-I  | top-II |
| $a$ (Å)                                       | 3.06   | 3.06   | 3.05   | 3.06   | 3.06   | 3.06   |
| $D$ (Å)                                       | 2.80   | 2.76   | 2.82   | 2.86   | 3.29   | 3.27   |
| $E_b$ (meV)                                   | -312.3 | -337.8 | -309.2 | -303.7 | -180.7 | -188.6 |

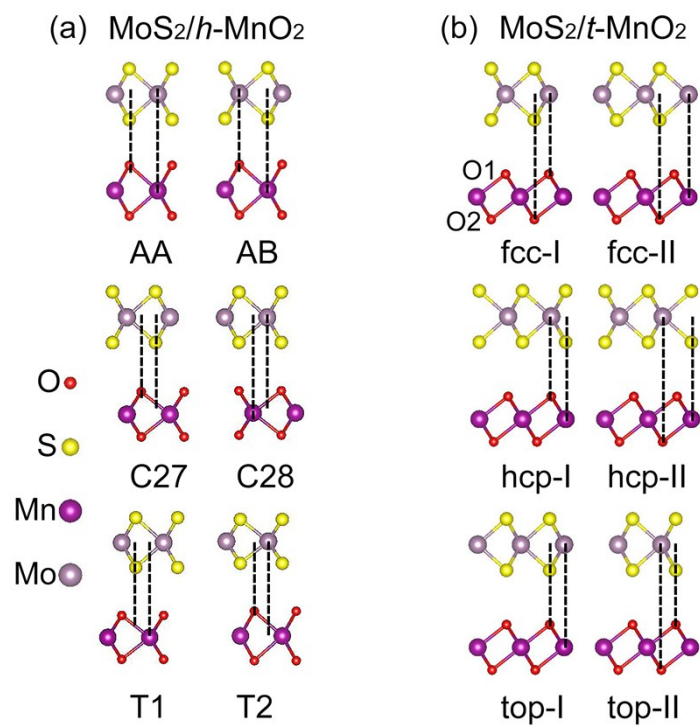

**Fig. S1.** Side views of the nonequivalent configurations of (a)  $\text{MoS}_2/h\text{-MnO}_2$  and (b)  $\text{MoS}_2/t\text{-MnO}_2$  heterostructures.

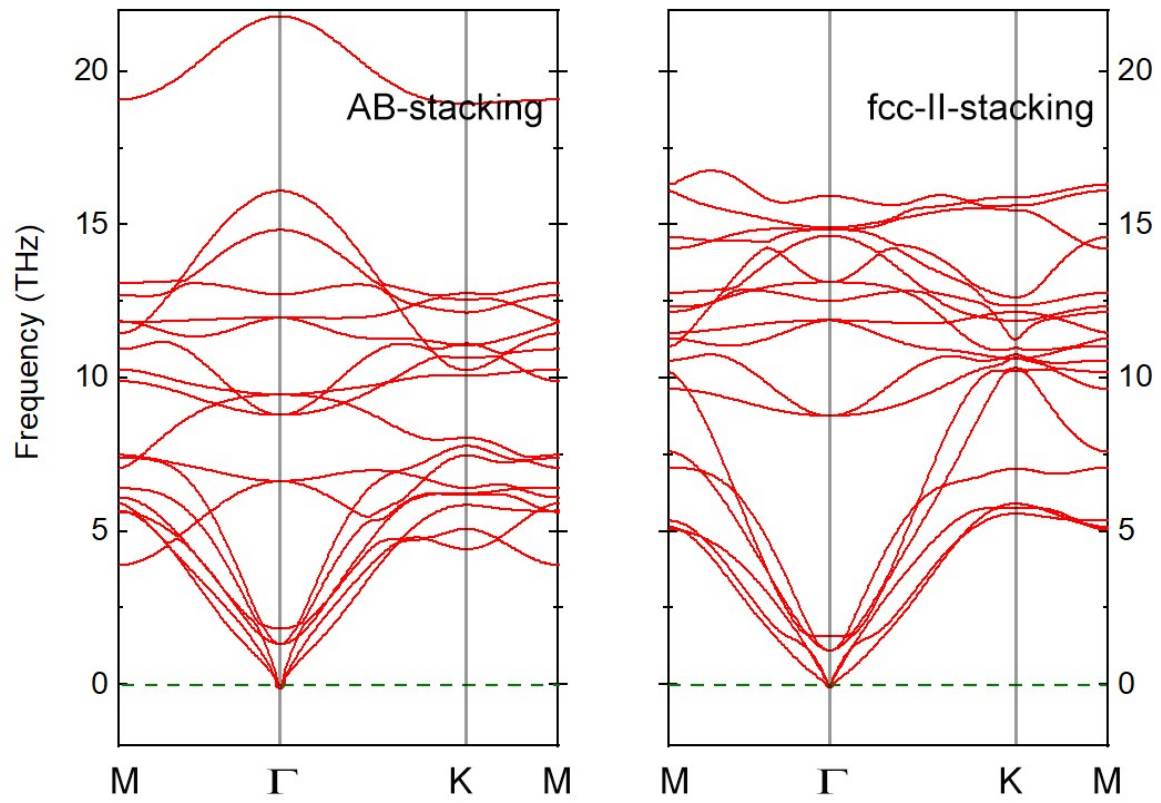

**Fig. S2.** Phonon bands of AB and fcc-II stacking models.

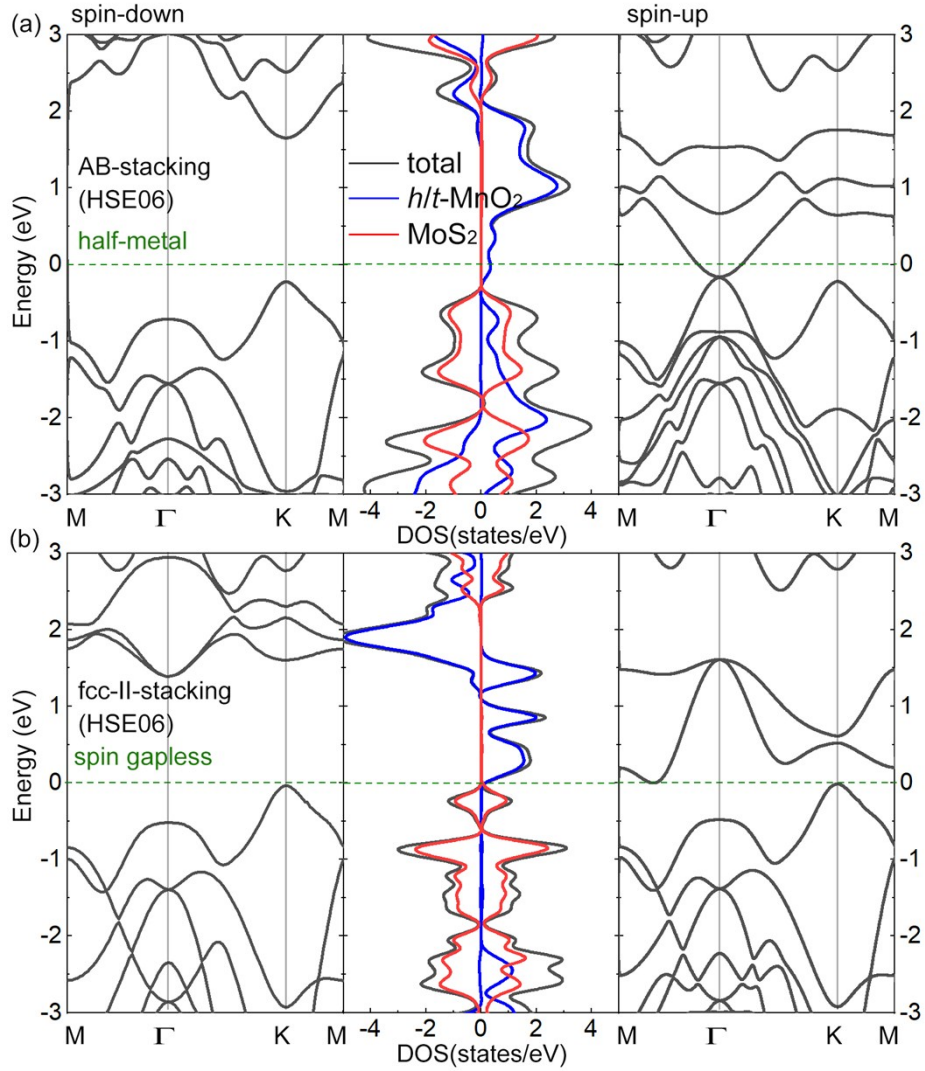

**Fig. S3.** The calculated band structures and DOS by HSE06 methods for (a) AB and (b) fcc-II stacking heterostructures, respectively. The Fermi levels are set to zero.

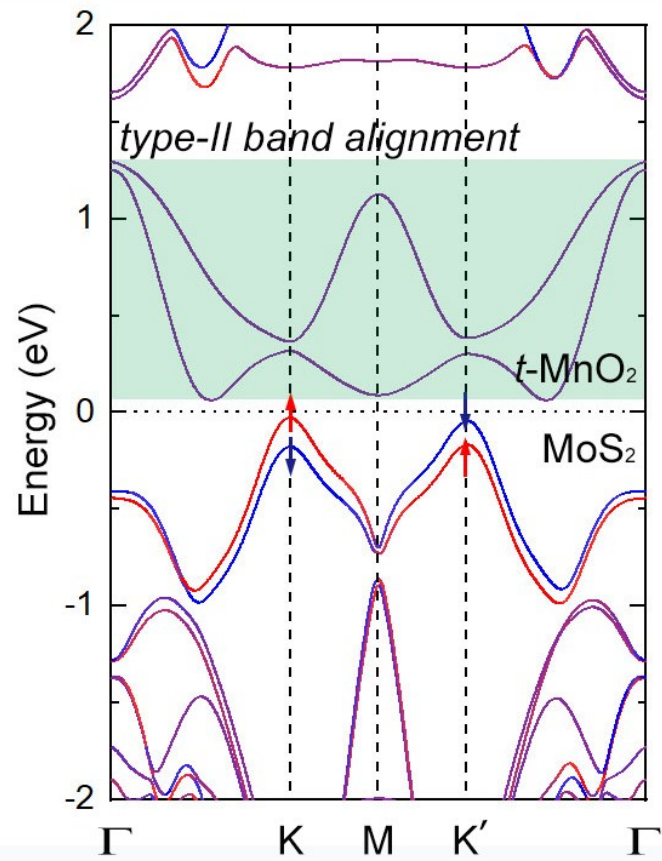

**Fig. S4.** Valley polarization in MoS<sub>2</sub>/t-MnO<sub>2</sub> heterostructure. Spin-up and spin-down states are presented by red and blue, respectively.

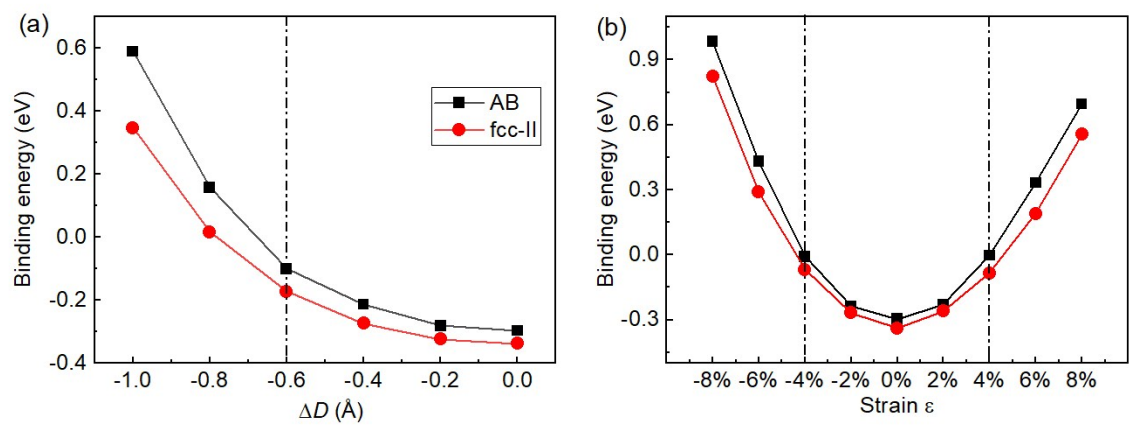

**Fig. S5.** Binding energies per unit cell as a function of (a) the interlayer distance and (b) in-plane strain in AB and fcc-II stacking heterostructures.



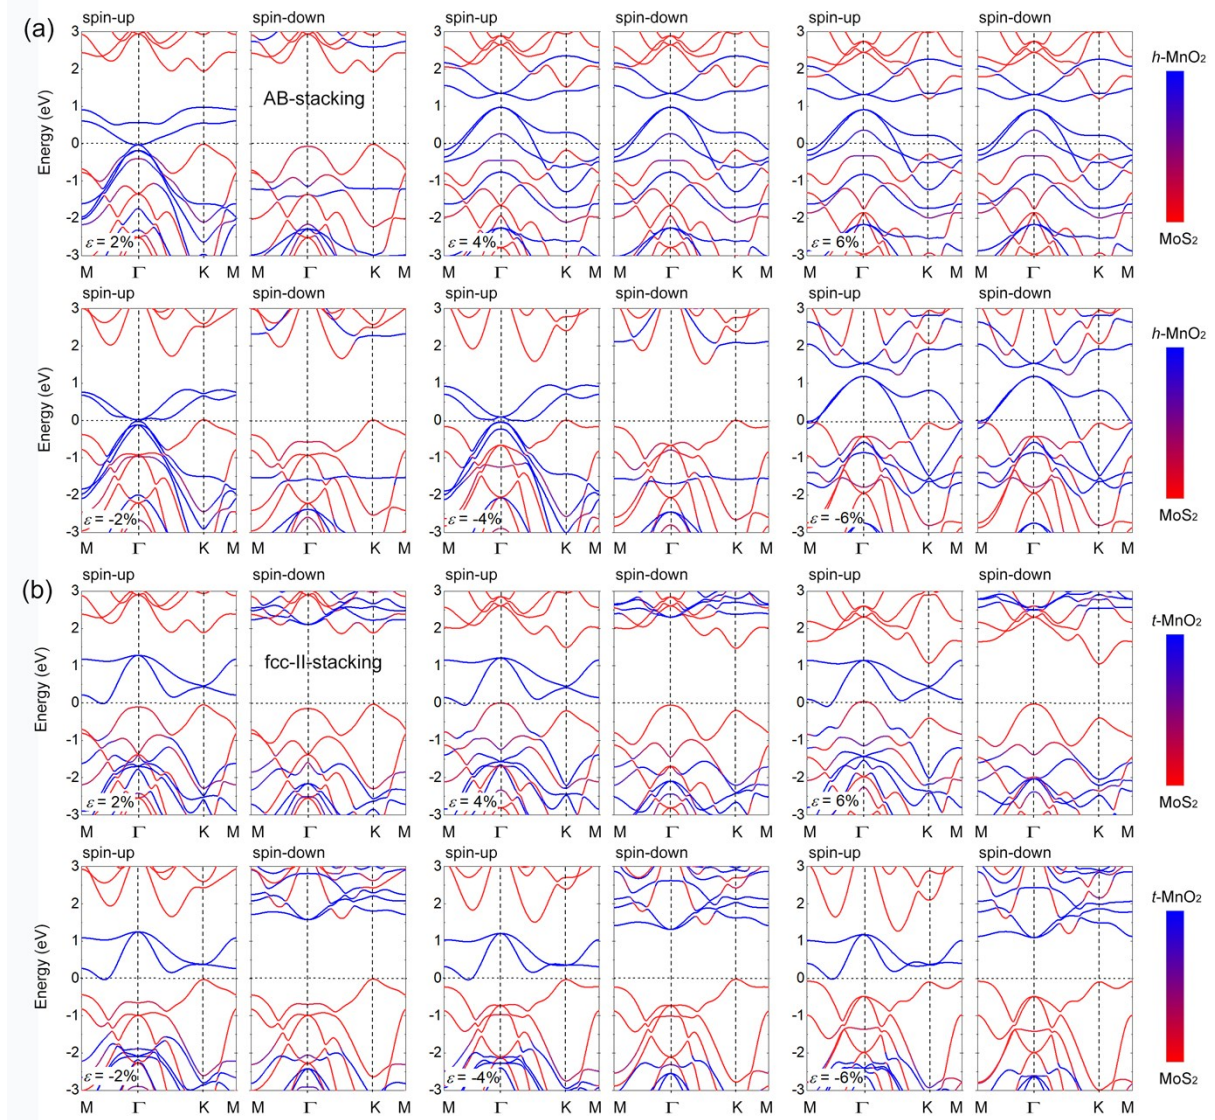

**Fig. S6.** Band structures of (a) AB-stacking and (b) fcc-II stacking models with varying in-plane biaxial strain. The Fermi level is set to zero.
